# Supplementary material
Source: publisher figshare collection journal article supplement (https://future-science-group.figshare.com/ndownloader/files/31698845)
Supplement: Supplementary file 1 [file 31698845]

Supplementary table 1 Quality assessment of all studies by Newcastle-Ottawa scale.

| Study              | Selection                                |                                     |                           |                                                                          | Comparability                                                                              | Outcomes              |                                                 |                                  | Total stars |
|--------------------|------------------------------------------|-------------------------------------|---------------------------|--------------------------------------------------------------------------|--------------------------------------------------------------------------------------------|-----------------------|-------------------------------------------------|----------------------------------|-------------|
|                    | Representativeness of the exposed cohort | Selection of the non-exposed cohort | Ascertainment of exposure | Demonstration that outcome of interest was not present at start of study | Comparability of cohorts on the basis of the design or analysis controlled for confounders | Assessment of outcome | Was follow-up long enough for outcomes to occur | Adequacy of follow-up of cohorts |             |
| Zhang, 2015        | -                                        | *                                   | *                         | *                                                                        | -                                                                                          | *                     | *                                               | *                                | 6           |
| Zhao, 2017         | *                                        | *                                   | *                         | *                                                                        | -                                                                                          | *                     | *                                               | *                                | 7           |
| Okuma, 2017        | -                                        | *                                   | *                         | *                                                                        | *                                                                                          | *                     | -                                               | *                                | 6           |
| Vecchiarelli, 2018 | -                                        | *                                   | *                         | *                                                                        | *                                                                                          | *                     | -                                               | *                                | 6           |
| Okuma, 2018        | *                                        | *                                   | *                         | *                                                                        | *                                                                                          | *                     | -                                               | *                                | 7           |
| Costantini, 2018   | *                                        | *                                   | *                         | *                                                                        | *                                                                                          | *                     | *                                               | *                                | 8           |
| Jin, 2018          | *                                        | *                                   | *                         | *                                                                        | *                                                                                          | *                     | -                                               | *                                | 7           |
| Tiako Meyo, 2020   | -                                        | *                                   | *                         | *                                                                        | *                                                                                          | *                     | *                                               | *                                | 7           |
| Castello, 2020     | *                                        | *                                   | *                         | *                                                                        | *                                                                                          | *                     | *                                               | *                                | 8           |
| Mazzaschi, 2020    | -                                        | *                                   | *                         | *                                                                        | -                                                                                          | *                     | *                                               | *                                | 6           |
| Jia, 2020          | *                                        | *                                   | *                         | *                                                                        | *                                                                                          | *                     | -                                               | *                                | 7           |
| Murakami, 2020     | *                                        | *                                   | *                         | *                                                                        | *                                                                                          | *                     | -                                               | *                                | 7           |

\*: A star was awarded; -: no star was awarded. Studies with 6 or more stars were considered of high quality.
